# Supplementary material for: Characterization of the Filovirus-Resistant Cell Line SH-SY5Y Reveals Redundant Role of Cell Surface Entry Factors
Source: MDPI journal article supplement (doi:10.3390/v11030275), 2019-03-19
Supplement: s1 [file s1]

SUPPLEMENTAL FIGURES:

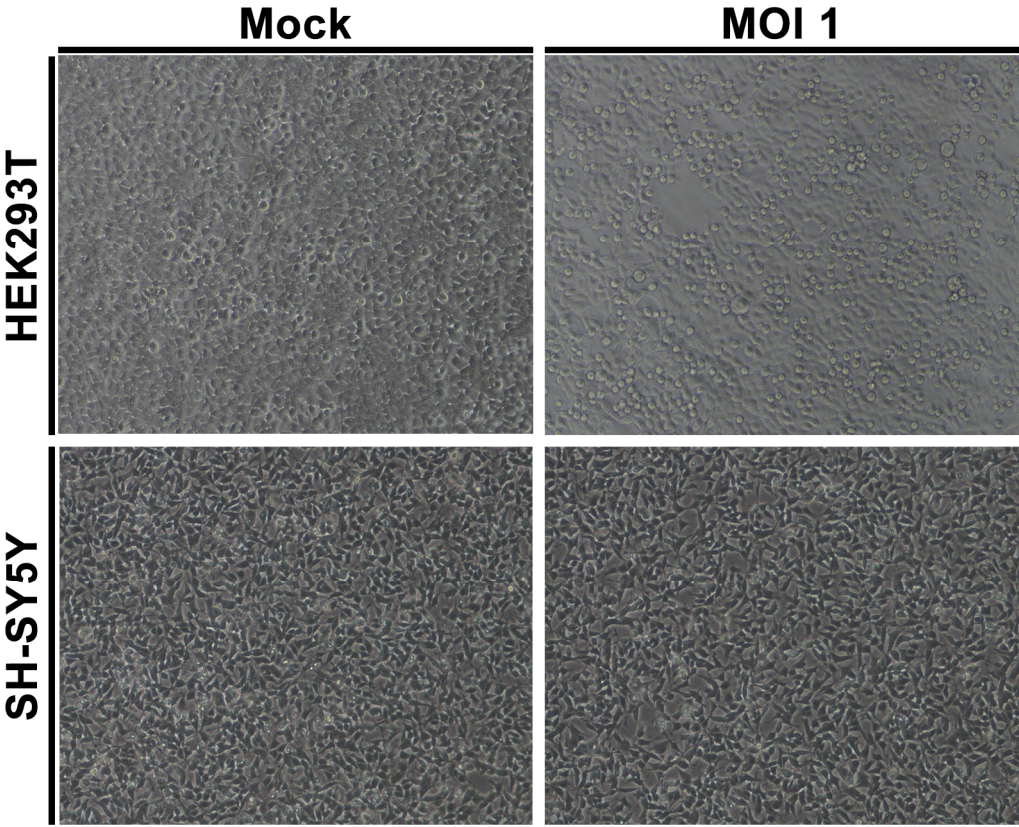

Figure S1. rVSVΔG-EBOV infection. Cell rounding caused by EBOV GP 24 h after mock or MOI 1 rVSVΔG-EBOV infection.

## PBS Treatment

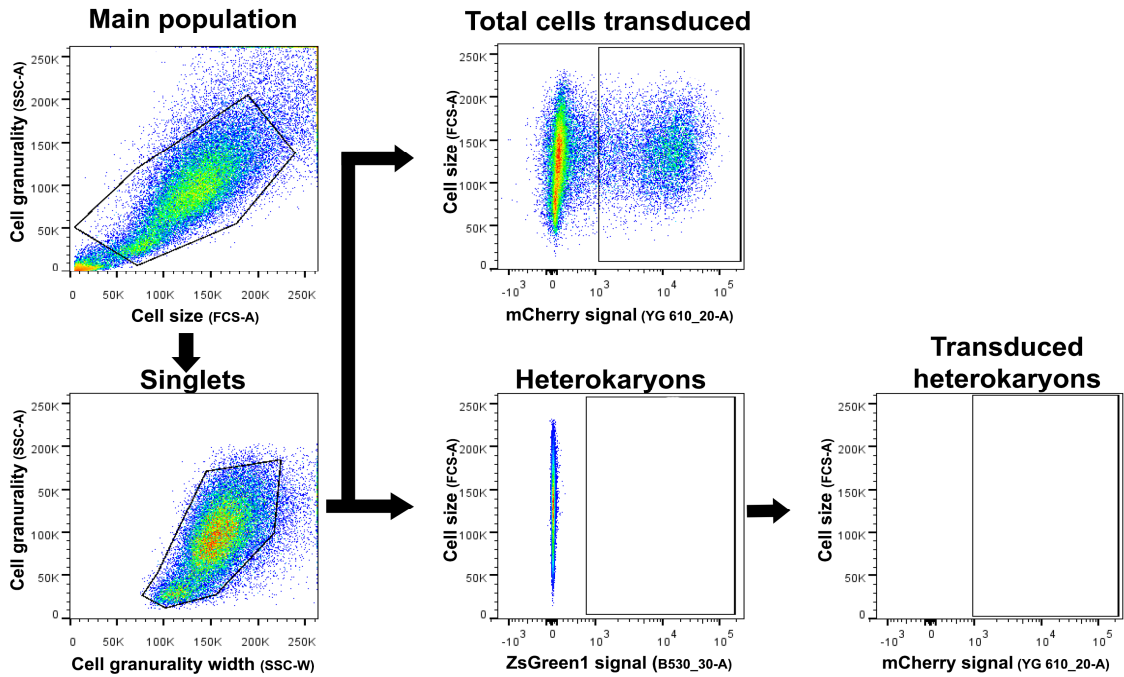

## PEG Treatment

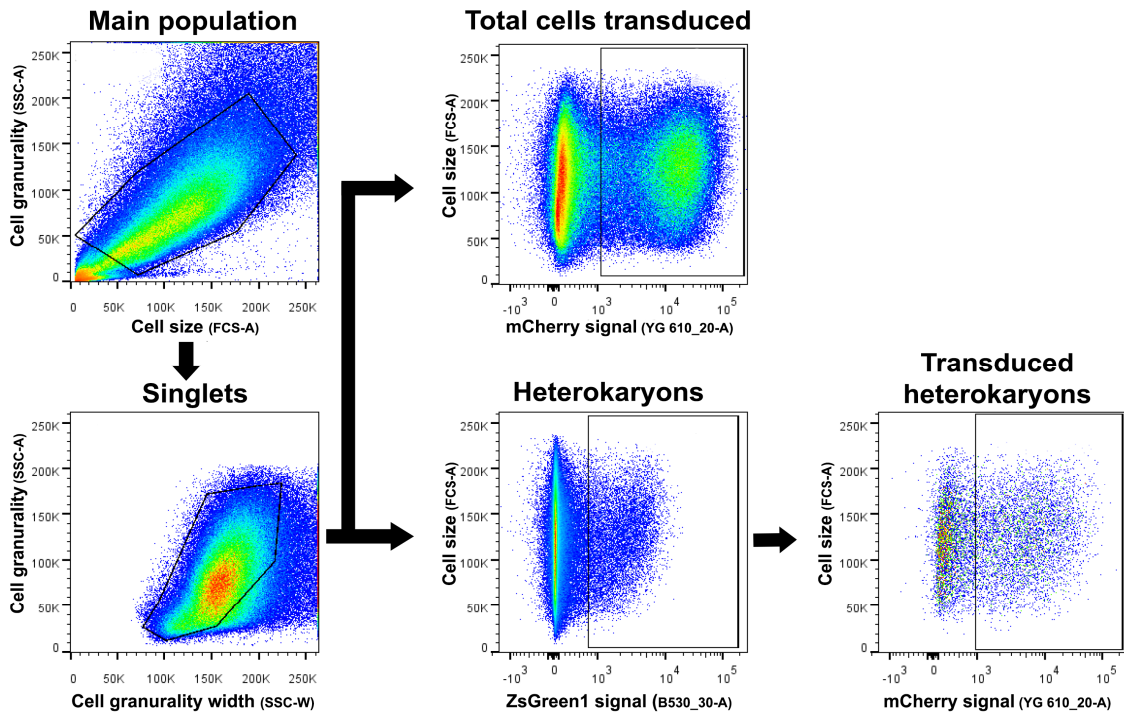

**Figure S2. Gating strategy for detection of heterokaryons and transduced heterokaryons.** First, cell main population was gated using cell size (FCS-A) over granularity (SSC-W). Then, single cells were discriminated by plotting SSC-A and SSC-W. For detection of total cell transduction (mCherry expression), YG 610\_20A channel was used. For the detection of heterokaryons, ZsGreen1 expressing cells were gated on the B530\_30-A green channel. To determine the percentage of transduced heterokaryons, ZsGreen1+ cells were drilled down and mCherry expression was determined using the YG 610\_20A channel.

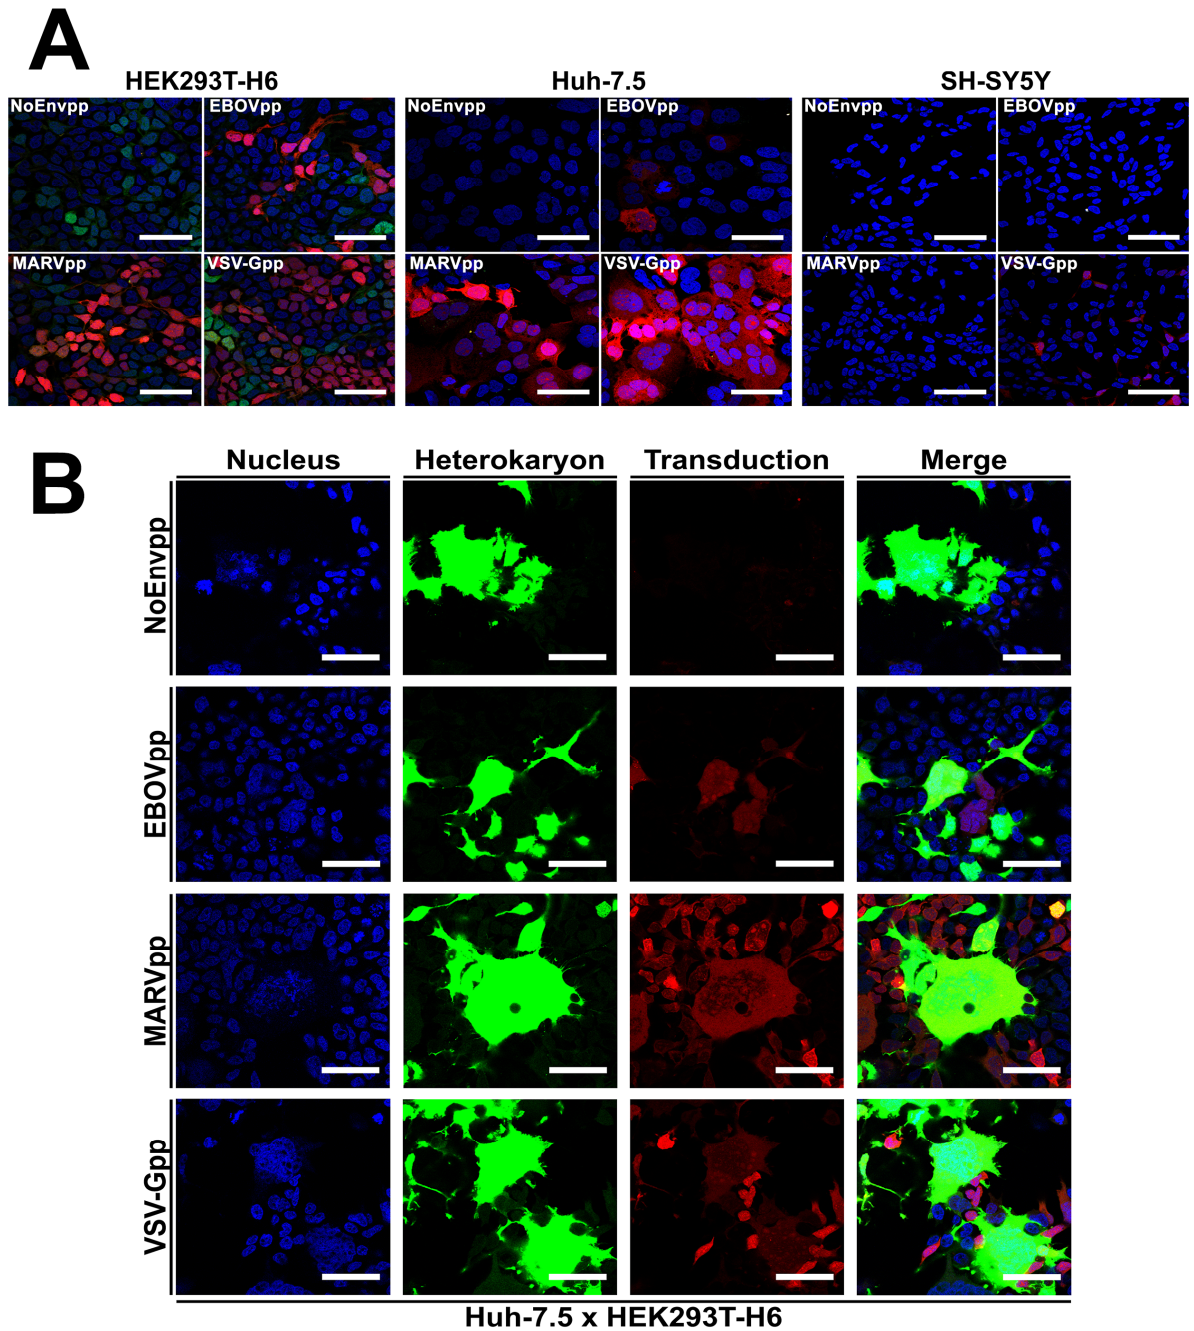

**Figure S3. Susceptibility of single cell lines and heterokaryons of Huh-7.5 and HEK293T-H6 cells.** (A) Single cell line transduction. Engineered cells for tetracycline inducible gene expression were transduced with the same NoEnvpp, EBOVpp, MARVpp, and VSV-Gpp / mCherry pseudoviral stocks as for Fig. 7 for 6 h at 37°C and incubated for 72 h for mCherry expression (red). Cells were fixed with 3% PFA, permeabilized with 0.1% TX100, and stained with DAPI for nuclear staining (blue). Of note, HEK293T-H6 cells express low but detectable levels of ZsGreen1 but heterokaryons have a higher abundance of the protein allowing the differentiation of heterokaryons from background by microscopy and flow cytometry. Scale bars = 50 μm. (B) Susceptible Huh-7.5 and HEK293T-H6 cell fusion/transduction assay. Co-culture cells were fused with PEG for 5 min at 37°C for heterokaryon formation (ZsGreen1 expression) and transduced 1 h later with the same viral stocks and methodology as above. Cells were fixed, permeabilized and stained as in (A).

**A**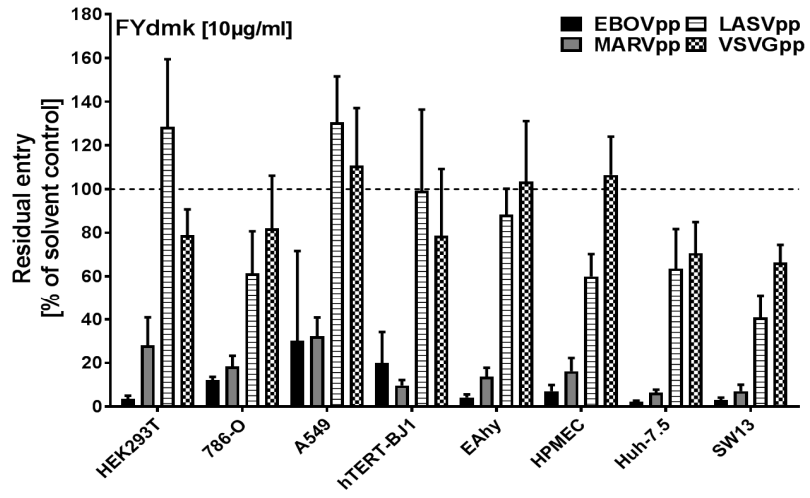**B**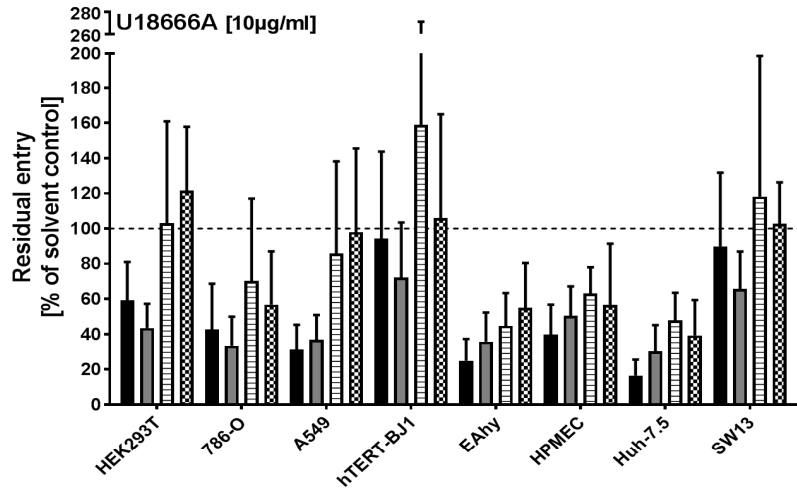**C**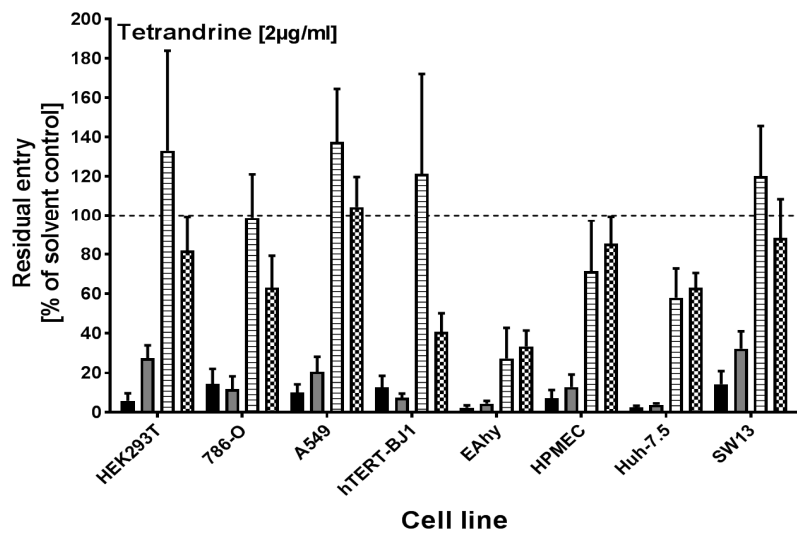



**Figure S4. Intracellular factors inhibition assays.** Susceptible cell lines were treated with vehicle control or indicated drugs at the specified concentration 1 h prior to transduction. Subsequently, indicated pseudoparticles were added and further incubated for 6 h. After transduction, cells were washed with 1X PBS and incubated for another 72 h prior to luciferase activity measurement. Graphs are shown as the % residual entry after normalization to vehicle transduction. Each bar represents 9 individual values from 3 independent experiments each performed in triplicate with SD represented as error bars.

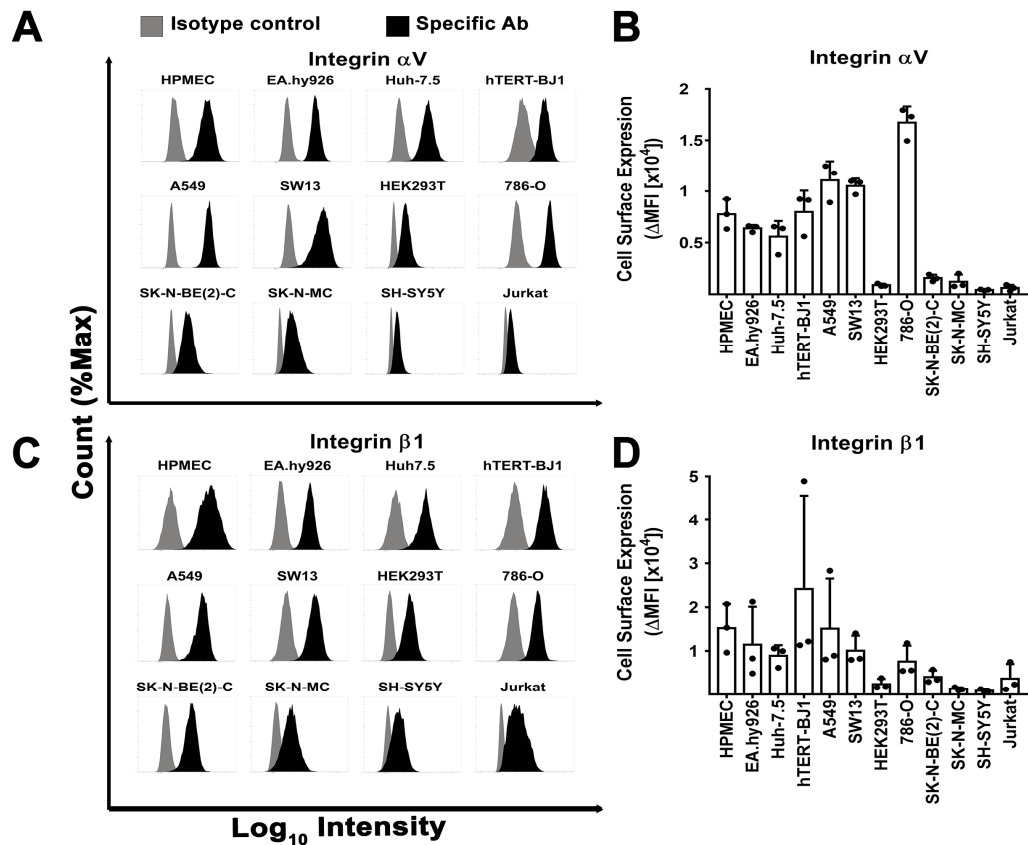

**Figure S5. Integrin  $\alpha V$  and  $\beta 1$  cell surface expression.** Saturating concentrations of mAb against integrin  $\alpha V$  (A-B),  $\beta 1$  (C-D) and respective isotype controls were used to detect surface protein levels of the indicated proteins in the panel of cell lines. Left-hand side represents histograms and right-hand side  $\Delta\text{MFI}$  values. Graphs represent the mean of 3 independent stainings and  $\pm$  SD.

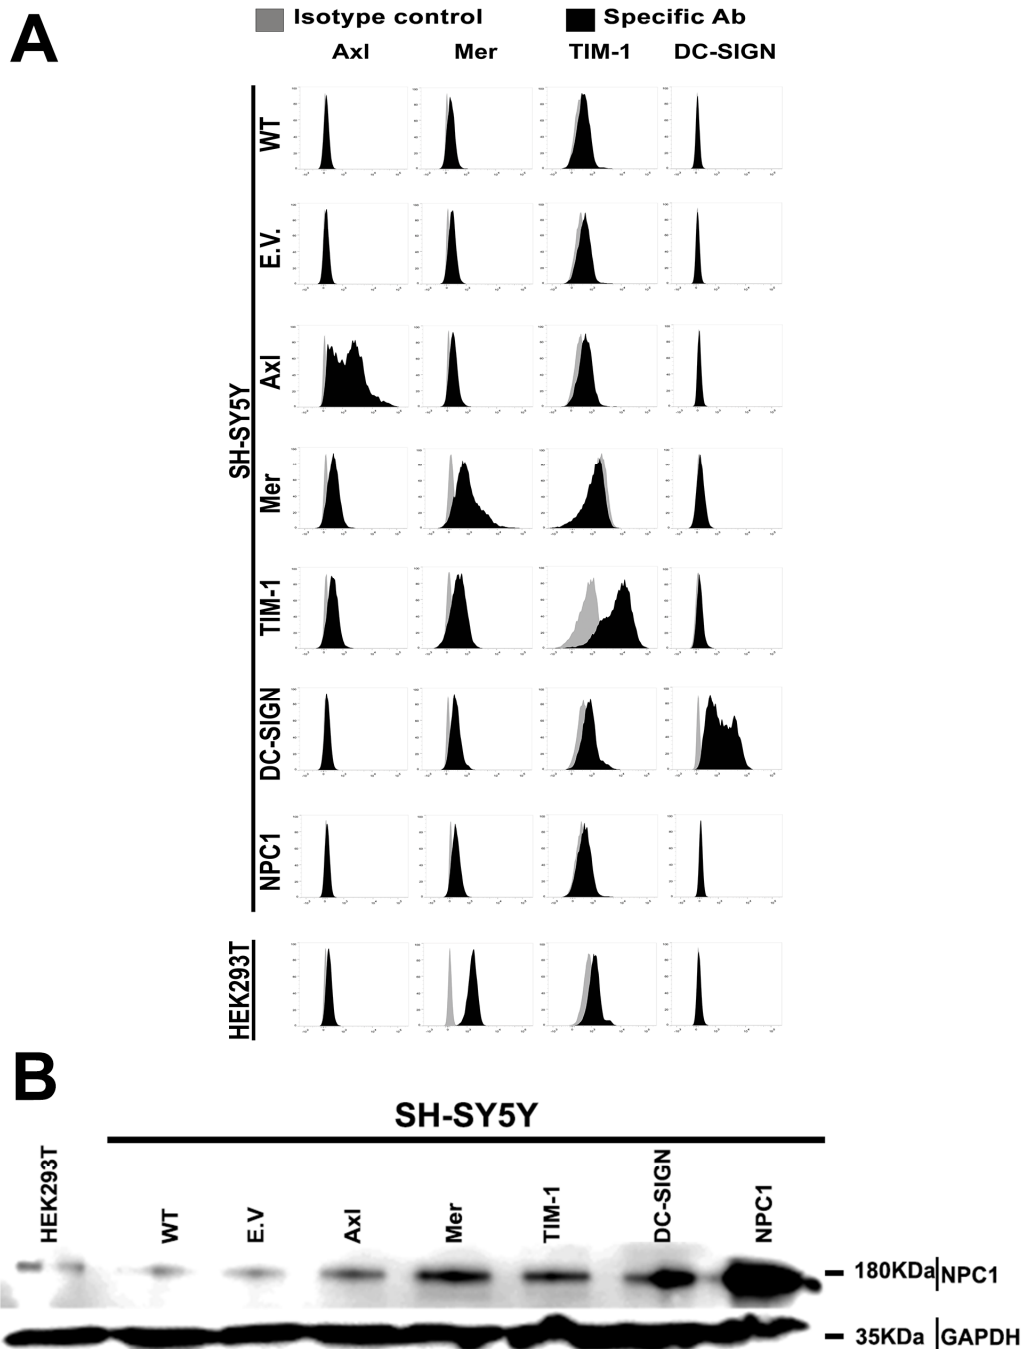

**Figure S6. Detection of ectopic expression of filovirus attachment factors.** (A) Cell surface staining of ectopically expressed surface factors. Saturating concentrations of APC-conjugated specific abs or isotype controls were incubated with live cells to determine the expression of the proteins at the plasma membrane. (B) NPC1 western-blot of HEK293T, SH-SY5Y WT and engineered cells.

**TABLE S1.** Reported filovirus attachment host factors.

| Name   | Gene Name | Protein family | Function in filovirus entry | Reference |
|--------|-----------|----------------|-----------------------------|-----------|
| ASGR-1 | ASGR1     | C-type Lectin  | Interact with GP glycans    | [26]      |

|                                      |         |                                |                                            |         |
|--------------------------------------|---------|--------------------------------|--------------------------------------------|---------|
| <b>ASGR-2</b>                        | ASGR2   | C-type Lectin                  | Interact with GP glycans                   | [26]    |
| <b>LSEctin</b>                       | CLEC4G  | C-type Lectin                  | Interact with GP glycans                   | [22]    |
| <b>DC-SIGNR</b>                      | CLEC4M  | C-type Lectin                  | Interact with GP glycans                   | [24,25] |
| <b>DC-SIGN</b>                       | CD209   | C-type Lectin                  | Interact with GP glycans                   | [24,25] |
| <b>hMGL</b>                          | CLEC10A | C-type Lectin                  | Interact with GP glycans                   | [20]    |
| <b>FR-<math>\alpha</math></b>        | FOLR1   | Folate receptor                | Unclear role in entry                      | [33,80] |
| <b>HPSG</b>                          | HSPG2   | Proteoglycan                   | Attachment factor                          | [81]    |
| <b>Ficolin-1</b>                     | FCN1    | Ficolin family                 | Bridge GP to ficolin receptor              | [82]    |
| <b>Axl</b>                           | AXL     | Tyrosine Kinase                | Increased micropinocytosis                 | [35]    |
| <b>Tyro3</b>                         | TYRO3   | Tyrosine Kinase                | Entry promotion, unclear                   | [29]    |
| <b>Mer</b>                           | MERTK   | Tyrosine Kinase                | Entry promotion, unclear                   | [29]    |
| <b>GAS-6</b>                         | GAS6    | Soluble tk <sup>a</sup> ligand | Bridge envelope PS <sup>b</sup> to TAM tks | [83]*   |
| <b>MFG-E8</b>                        | MFGE8   | Soluble integrin ligand        | Bridge envelope PS to integrins            | [69]*   |
| <b>TIM-1</b>                         | HVACR1  | TIM                            | GP or envelope PS interaction              | [28,64] |
| <b>TIM-4</b>                         | TIMD4   | TIM                            | Envelope PS interaction                    | [27]    |
| <b>Integrin <math>\alpha</math>V</b> | ITGAV   | Integrin                       | Regulate cathepsin activity                | [31]    |
| <b>Integrin <math>\beta</math>1</b>  | ITGB1   | Integrin                       | Regulate cathepsin activity                | [31]    |
| <b>SCARA1</b>                        | MSR1    | Scavenger R. class A           | PS related entry?                          | [56]    |
| <b>SCARA2</b>                        | MARCO   | Scavenger R. class A           | PS related entry?                          | [56]    |
| <b>CSR</b>                           | SCARA3  | Scavenger R. class A           | PS related entry?                          | [56]    |
| <b>SCARA4</b>                        | COLEC12 | Scavenger R. class A           | PS related entry?                          | [56]    |
| <b>NET33</b>                         | SCARA5  | Scavenger R. class A           | PS related entry?                          | [56]    |

a-tyrosine kinase; b-Phosphatidylserine;

\*Studies performed with receptor binding domain deleted Sindbis E glycoprotein mutant viruses.

TABLE S2. Filovirus entry attachment factors microarray data (Relative Light Units)

| Gene Name | Cell line |          |       |         |         |        |         |      |       |            |         |       |       |
|-----------|-----------|----------|-------|---------|---------|--------|---------|------|-------|------------|---------|-------|-------|
|           | PHH       | EA.hy926 | Huh7  | SH-SY5Y | SK-N-SH | Jurkat | SK-N-SH | A549 | 786-C | hTERT- BJ1 | HEK293T | HPM1  | SW631 |
| ASGR1     | 284271    | 1072     | 17704 | 815     | 133     | 2767   | 350     | 248  | 31    | 212        | 166     | 80    | 87    |
| ASGR2     | 197015    | 15       | 51317 | 20      | 16      | 20     | 18      | 27   | 22    | 20         | 19      | 22    | 22    |
| CLEC4G    | 1425      | 21       | 15    | 15      | 15      | 15     | 15      | 16   | 17    | 22         | 15      | 20    | 20    |
| CLEC4M    | 524       | 31       | 21    | 46      | 35      | 56     | 41      | 42   | 36    | 34         | 24      | 46    | 44    |
| CD209     | 112       | 19       | 17    | 19      | 16      | 18     | 19      | 18   | 20    | 19         | 21      | 20    | 29    |
| CLEC10A   | 191       | 18       | 214   | 19      | 15      | 17     | 19      | 29   | 17    | 16         | 19      | 15    | 22    |
| FOLR1     | 220       | 60       | 98    | 106     | 290     | 69     | 1543    | 145  | 6776  | 743        | 166     | 66    | 341   |
| HSPG2     | 503       | 22846    | 9454  | 434     | 523     | 192    | 4873    | 3878 | 12599 | 10170      | 430     | 3883  | 1284  |
| FCN1      | 510       | 22       | 16    | 23      | 20      | 17     | 20      | 18   | 25    | 23         | 17      | 21    | 27    |
| AXL       | 593       | 28006    | 61    | 72      | 142     | 50     | 12605   | 6730 | 16890 | 41919      | 56      | 39230 | 102   |
| TYRO3     | 58        | 1024     | 4129  | 2032    | 203     | 1785   | 1194    | 1072 | 1588  | 1121       | 3423    | 596   | 3297  |
| MERTK     | 652       | 758      | 897   | 156     | 133     | 79     | 198     | 85   | 60    | 15         | 302     | 71    | 484   |
| GAS6      | 915       | 519      | 15    | 1593    | 15      | 15     | 869     | 222  | 2861  | 31132      | 295     | 1105  | 644   |
| MFGE8     | 43        | 388      | 98    | 212     | 466     | 896    | 1185    | 482  | 683   | 2731       | 205     | 246   | 456   |
| HAVCR1    | 20        | 130      | 976   | 15      | 15      | 15     | 15      | 513  | 1722  | 15         | 15      | 15    | 15    |
| TIMD4     | 464       | 43       | 149   | 15      | 15      | 15     | 15      | 218  | 514   | 15         | 15      | 15    | 15    |
| ITGAV     | 2119      | 10510    | 9994  | 2248    | 229     | 924    | 6161    | 6446 | 13681 | 8923       | 1495    | 3958  | 13113 |
| ITGB1     | 3362      | 6616     | 4000  | 2196    | 120     | 917    | 5128    | 9686 | 9058  | 20496      | 513     | 12351 | 3764  |
| MSR1      | 52        | 15       | 15    | 15      | 18      | 15     | 470     | 15   | 67    | 89         | 65      | 17    | 15    |
| MARCO     | 6636      | 15       | 48    | 15      | 15      | 15     | 15      | 17   | 15    | 15         | 15      | 15    | 15    |
| SCAR3     | 1235      | 2662     | 1966  | 989     | 576     | 194    | 3816    | 9760 | 1009  | 3323       | 430     | 13801 | 141   |
| COLEC12   | 15        | 15       | 57    | 15      | 98      | 15     | 2295    | 15   | 15    | 658        | 675     | 308   | 15    |



|      |     |    |    |    |    |    |    |     |    |    |    |    |    |
|------|-----|----|----|----|----|----|----|-----|----|----|----|----|----|
| SCAR |     |    |    |    |    |    |    |     |    |    |    |    |    |
| A    | 102 | 16 | 15 | 23 | 26 | 21 | 19 | 930 | 19 | 18 | 25 | 19 | 17 |
| 5    |     |    |    |    |    |    |    |     |    |    |    |    |    |

---
